# Supplementary material
Source: PubMed Central journal article supplement (PMC5007135)

## Supplementary Online Content

Phadke VK, Bednarczyk RA, Salmon DA, Omer SB. Association between vaccine refusal and vaccine-preventable diseases in the United States: a review of measles and pertussis. *JAMA*. doi:10.1001/jama.2016.1353.

**eFigure 1A.** Studies of Published Measles Cases From January 1, 2000, Through November 30, 2015

**eFigure 1B.** Studies on Measles Risk and Vaccine Delay, Refusal or Exemption Through November 30, 2015

**eFigure 2A.** Studies on Epidemic and Endemic Pertussis From January 1, 1977, Through November 30, 2015

**eFigure 2B.** Studies on Pertussis Risk and Vaccine Delay, Refusal, or Exemption Through November 30, 2015

This supplementary material has been provided by the authors to give readers additional information about their work.

**eFigure 1A:** Studies of published measles cases from January 1, 2000 through November 30, 2015

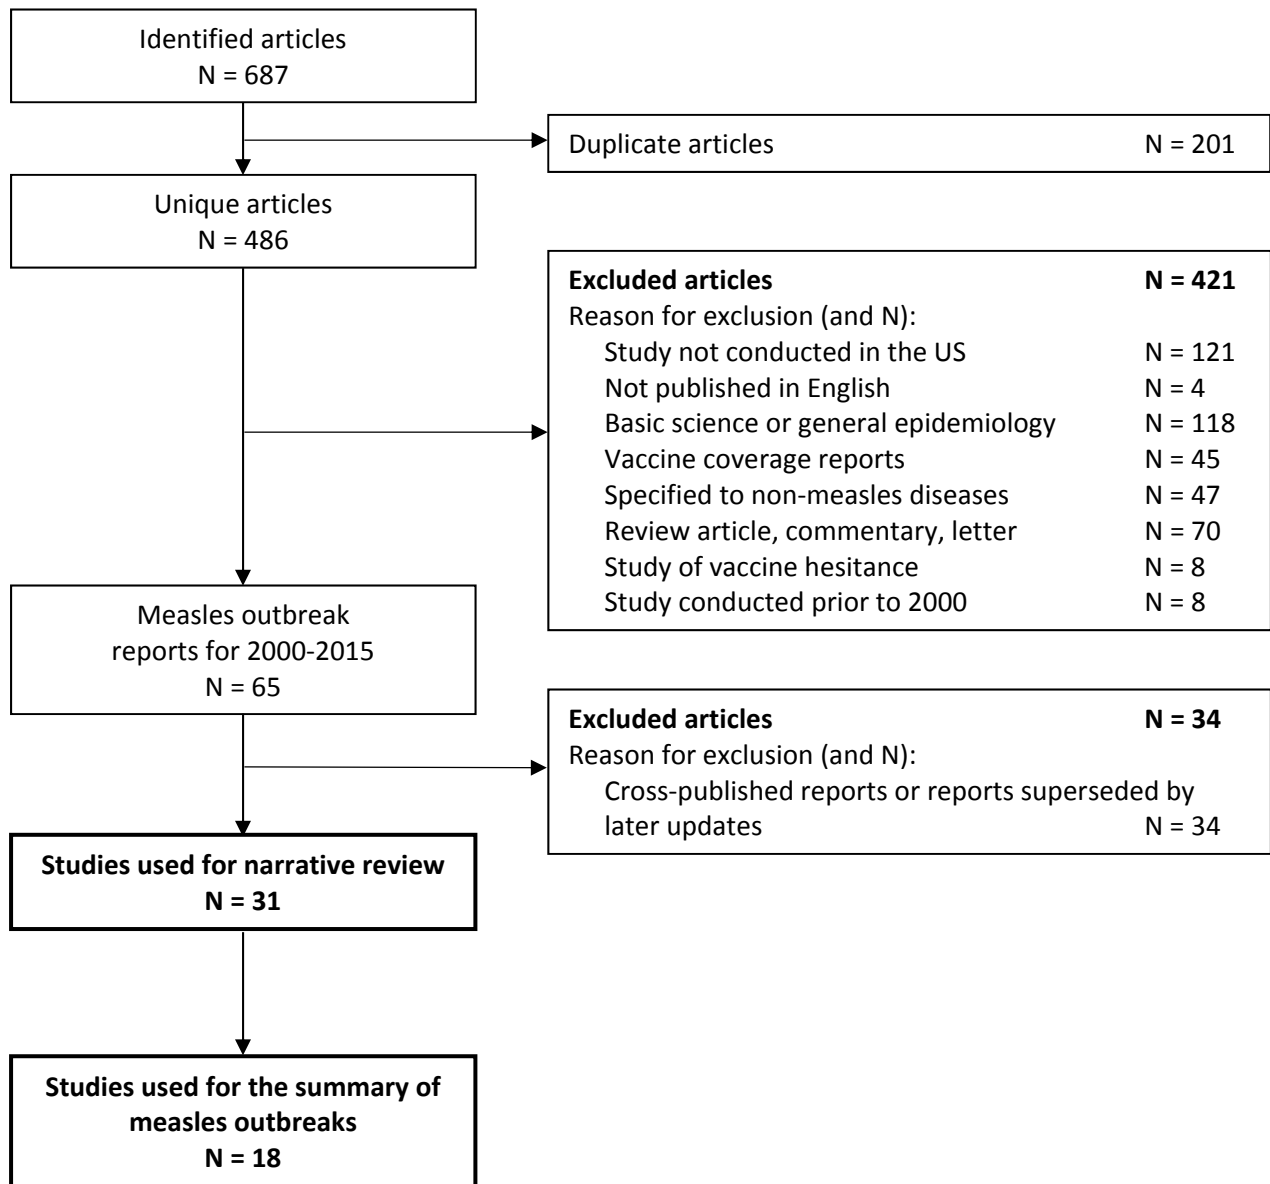

**eFigure 1B:** Studies on measles risk and vaccine delay, refusal or exemption through November 30, 2015

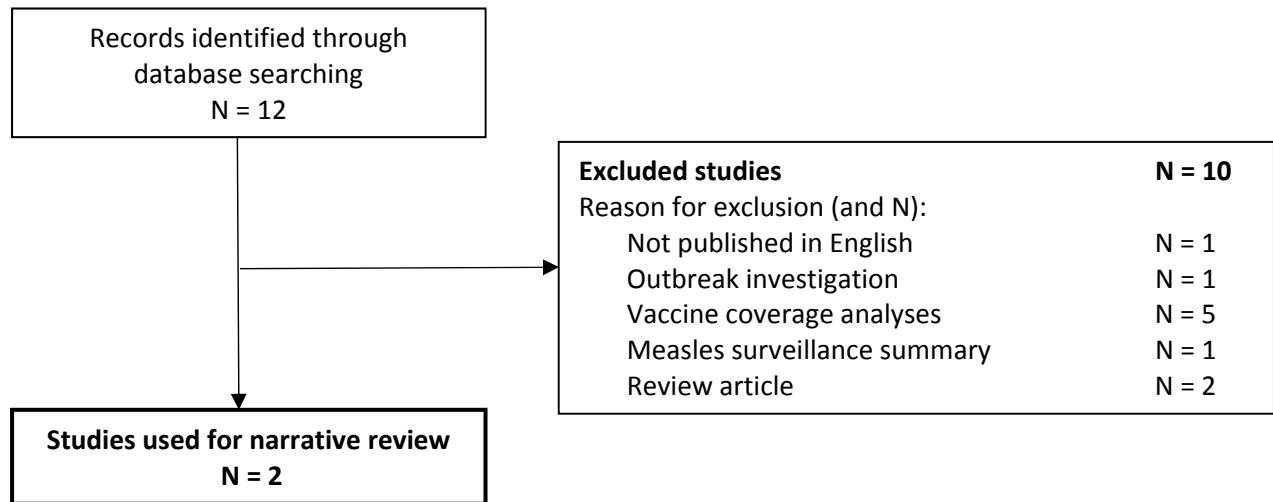

**eFigure 2A.** Studies on epidemic and endemic pertussis from January 1, 1977, through November 30, 2015

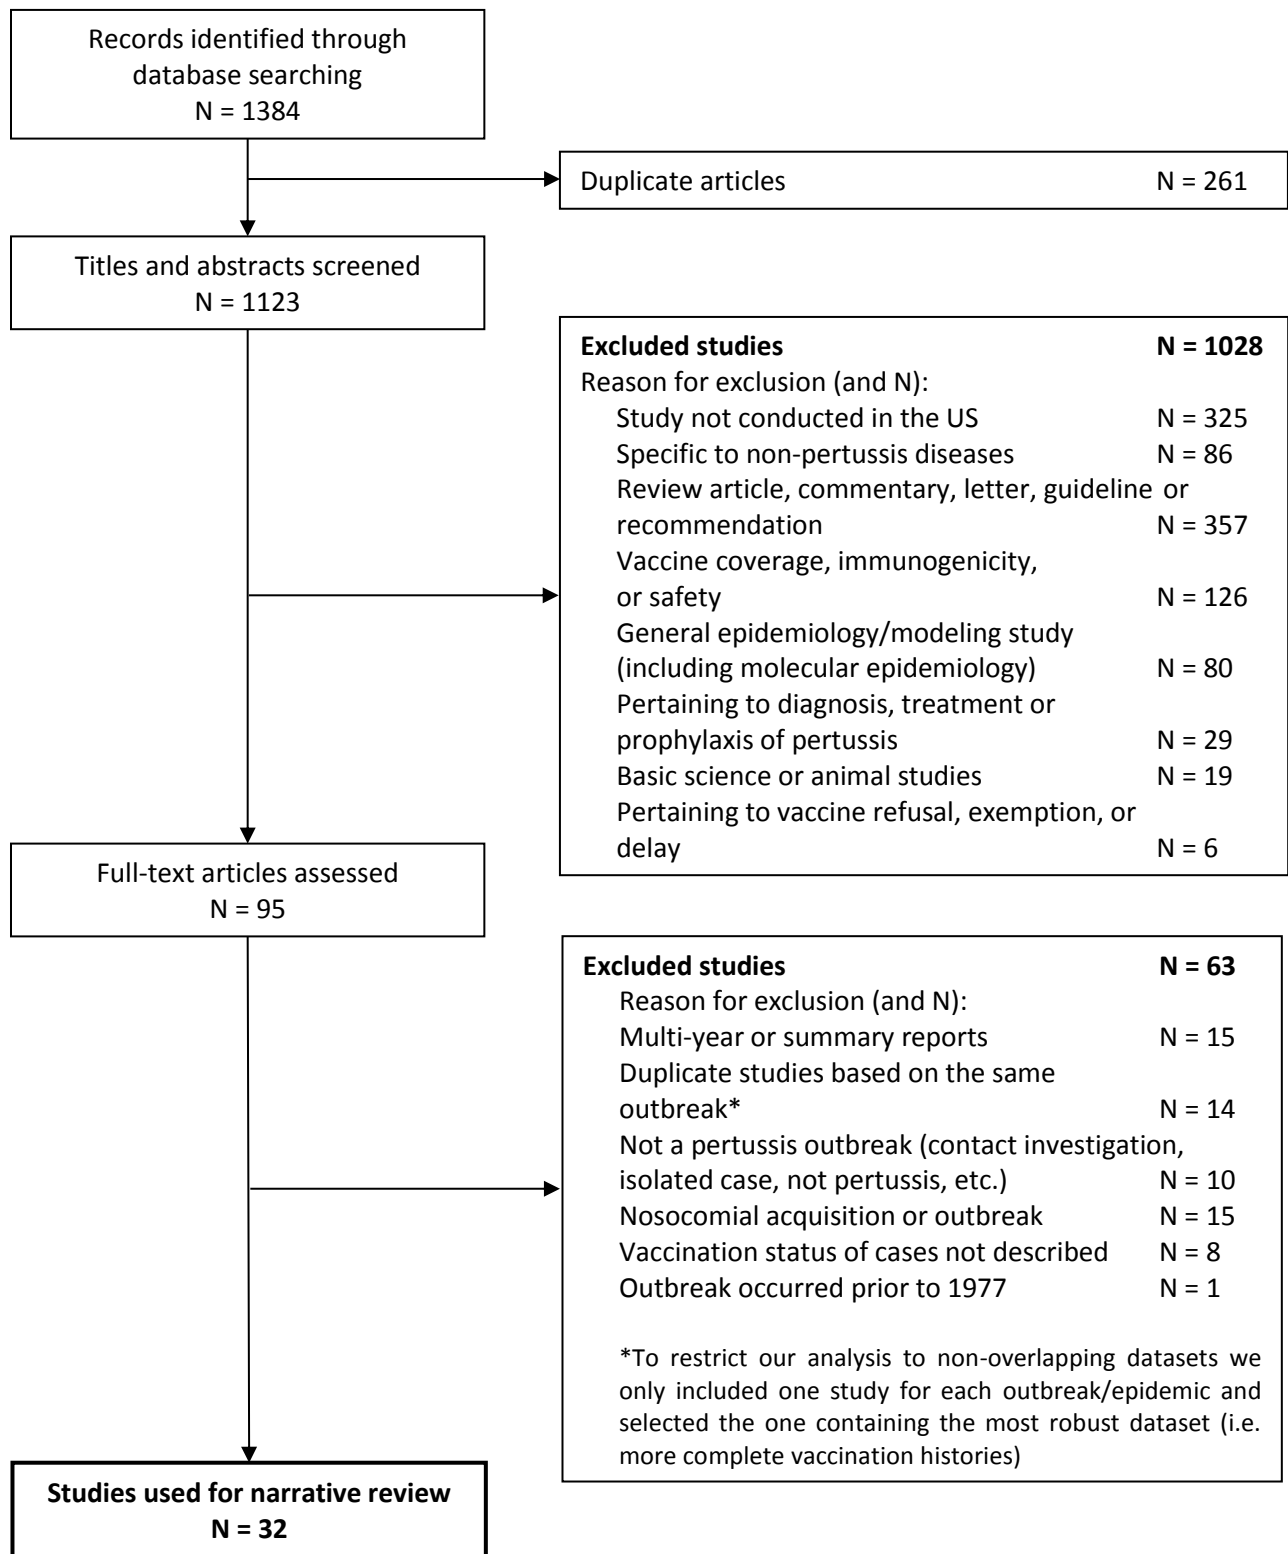

**eFigure 2B.** Studies on pertussis risk and vaccine delay, refusal, or exemption through November 30, 2015

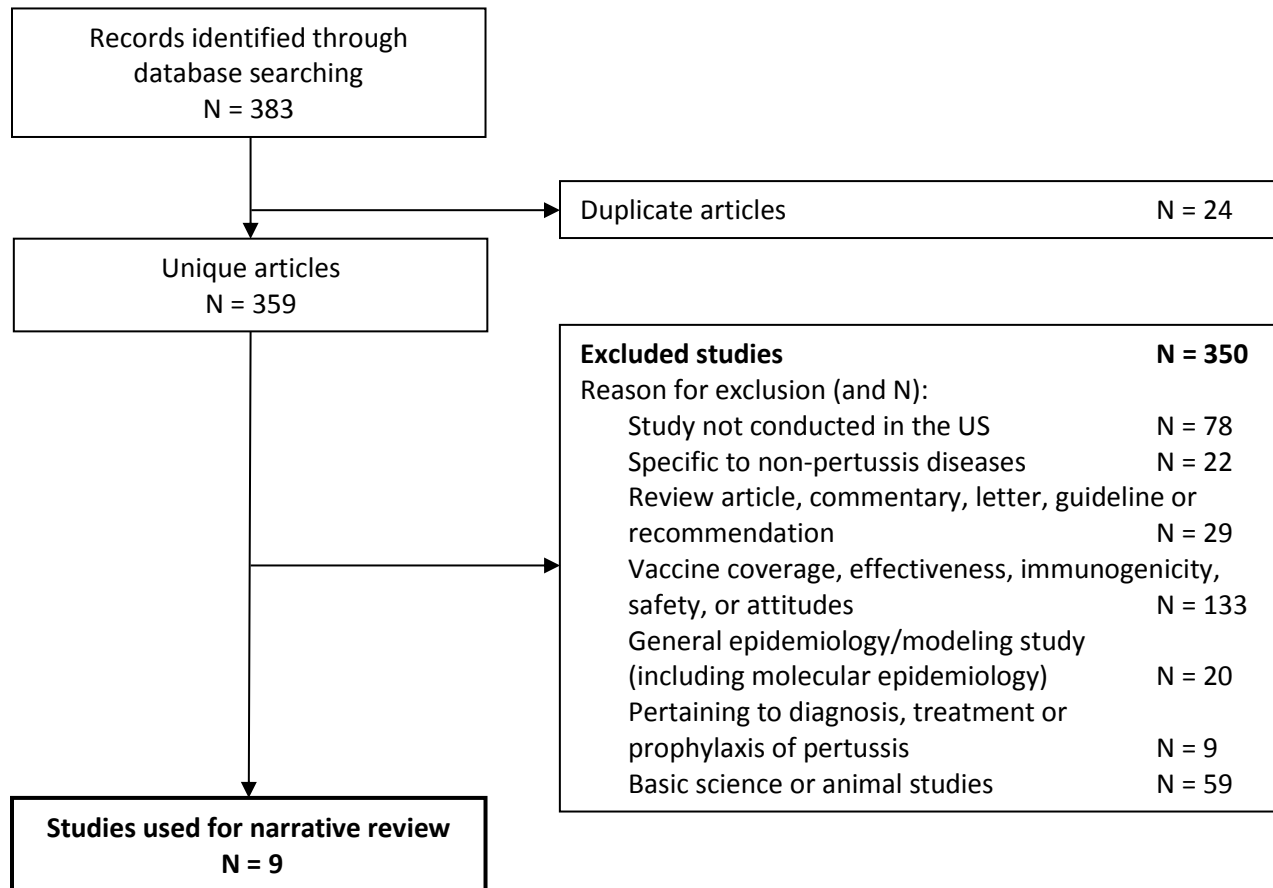

Supplement: NIHMS812461-supplement-Supplemental_Content.pdf [file NIHMS812461-supplement-Supplemental_Content.pdf]
